# Supplementary material for: Water dynamics and self-assembly of single-chain nanoparticles in concentrated solutions
Source: Royal Society of Chemistry journal article supplement (doi:10.1039/d0sm01447h), 2020-01-01
Supplement: d0sm01447h1.pdf [file d0sm01447h1.pdf]

## Supplementary Information

# Water dynamics and self-assembly of single-chain nanoparticles in concentrated solutions

Beatriz Robles-Hernández,<sup>\*ab</sup> Edurne González,<sup>b‡</sup> José A. Pomposo,<sup>abc</sup> Juan Colmenero<sup>abd</sup> and Ángel Alegría<sup>\*ab</sup>

<sup>a</sup> Departamento de Polímeros y Materiales Avanzados: Física, Química y Tecnología, University of the Basque Country (UPV/EHU), Apartado 1072, 20080 San Sebastián, Spain

<sup>b</sup> Centro de Física de Materiales, Paseo Manuel de Lardizabal 5, 20018 San Sebastián, Spain

<sup>c</sup> IKERBASQUE-Basque Foundation for Science, María Díaz de Haro 3, E-48013 Bilbao, Spain

<sup>d</sup> Donostia International Physics Center, Paseo Manuel de Lardizabal 4, 20018 San Sebastián, Spain

<sup>‡</sup> Present address: POLYMAT, Kimika Aplikatua saila, Kimika Fakultatea, University of the Basque Country (UPV/EHU), Joxe Mari Korta Zentroa, Tolosa Hiribidea 72, 20018 San Sebastián, Spain

## 1 Additional characterization techniques

### 1.1 Dynamic Light Scattering (DLS)

A Malvern Zetasizer Nano ZS apparatus was used to determine the hydrodynamic radius of the samples in deionized water. The “size distribution by number” plot was employed in this work.

### 1.2 Size-Exclusion Chromatography / Multi-Angle Laser Light Scattering (SEC/MALLS)

For the amphiphilic poly(OEGMA-*ran*-AEMA) and poly(OEGMA-*b*-AEMA) copolymers, SEC/MALLS measurements were performed at 30 °C on an Agilent 1200 system equipped with PLgel 5 $\mu$ m Guard and PLgel 5 $\mu$ m MIXED-C columns, a differential refractive index (RI) detector (Optilab Rex, Wyatt) and a multi-angle laser light scattering (MALLS) detector (MiniDawn Treos, Wyatt). Data analysis was performed with ASTRA Software from Wyatt (poly(OEGMA)-based polymers:  $dn/dc=0.115$ , on-line determination). The same procedure was followed for poly(OEGMA). THF was used as eluent at a flow rate of 1 ml/min.

### 1.3 <sup>1</sup>H Nuclear Magnetic Resonance (<sup>1</sup>H-RMN)

<sup>1</sup>H-NMR spectra were recorded at room temperature on a Bruker spectrometer operating at 400 MHz using CDCl<sub>3</sub> as solvent.

## 2 Supporting data

### 2.1 Comparison of hydrodynamic sizes by DLS measurements

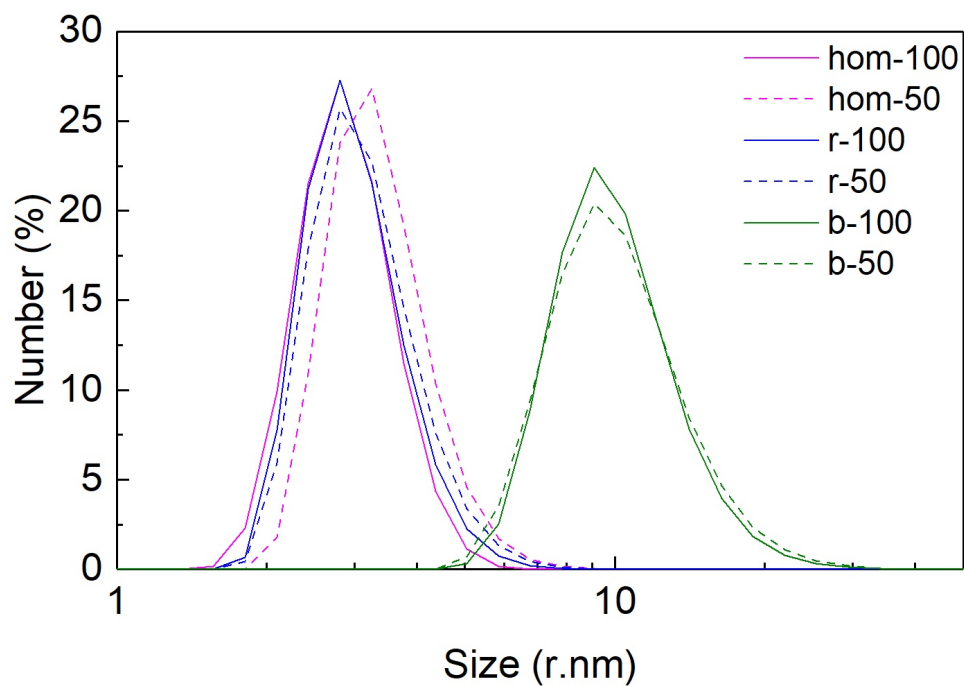

Figure 1 Hydrodynamic size distributions for a P(OEGMA) polymer (pink lines), an amphiphilic poly(OEGMA-*ran*-AEMA) random copolymer (blue lines) and an amphiphilic poly(OEGMA-*b*-AEMA) block copolymer (green lines) at 50 mg/mL (dashed lines) and 100 mg/mL (solid lines) in water, as determined by DLS.

Table 1 Hydrodynamic radius of the samples.

| Sample  | wt frac.<br>water | wt frac.<br>OEGMA | DLS $R_H$<br>(nm) |
|---------|-------------------|-------------------|-------------------|
| ran-50  | 0.952             | 0.042             | 3.2               |
| ran-100 | 0.909             | 0.079             | 3.1               |
| hom-50  | 0.952             | 0.048             | 3.4               |
| hom-100 | 0.909             | 0.091             | 2.9               |
| b-50    | 0.952             | 0.018             | 10.5              |
| b-100   | 0.909             | 0.033             | 10.3              |

## 2.2 SEC traces of the polymers synthesized in this work

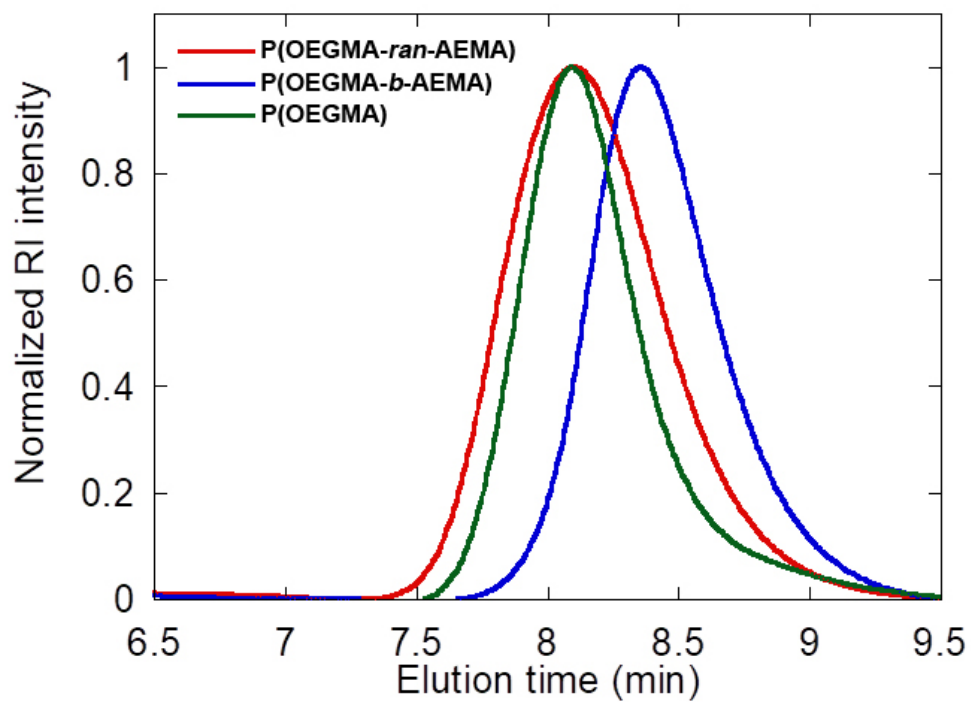

Figure 2 SEC traces in THF corresponding to a P(OEGMA) polymer (green line), an amphiphilic poly(OEGMA-*ran*-AEMA) random copolymer (red line), and an amphiphilic poly(OEGMA-*b*-AEMA) block copolymer (blue line).

### 2.3 $^1\text{H}$ -NMR spectra of the polymers synthesized in this work

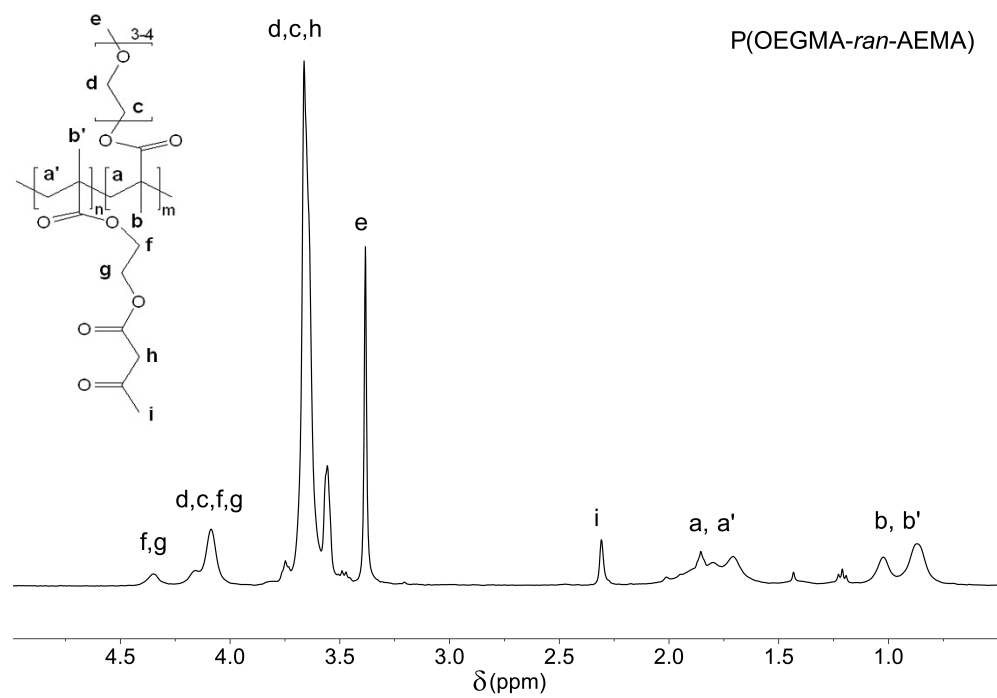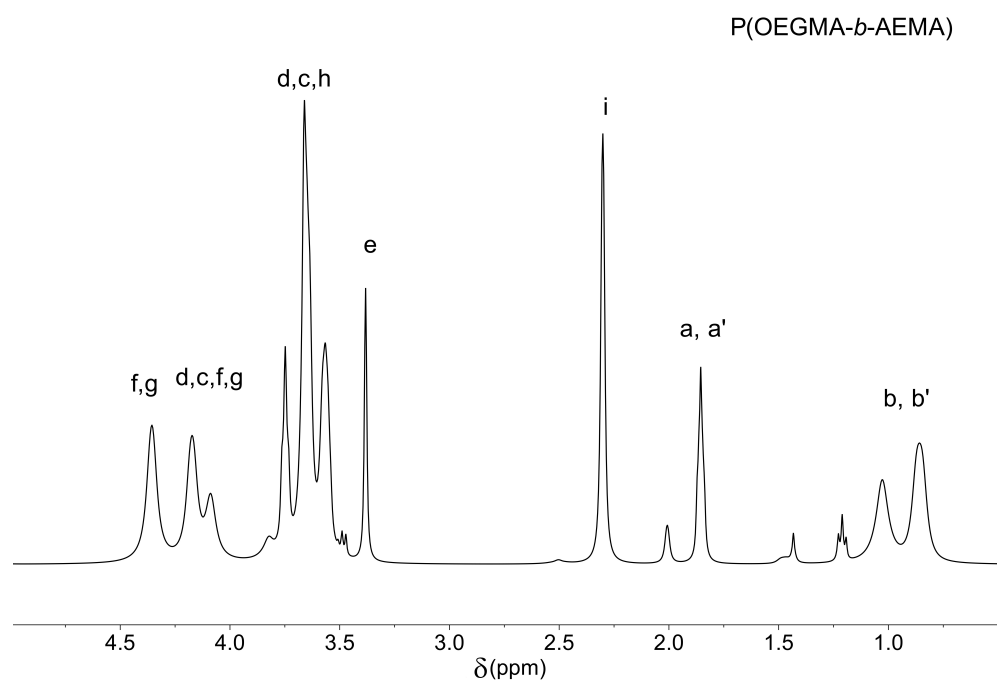

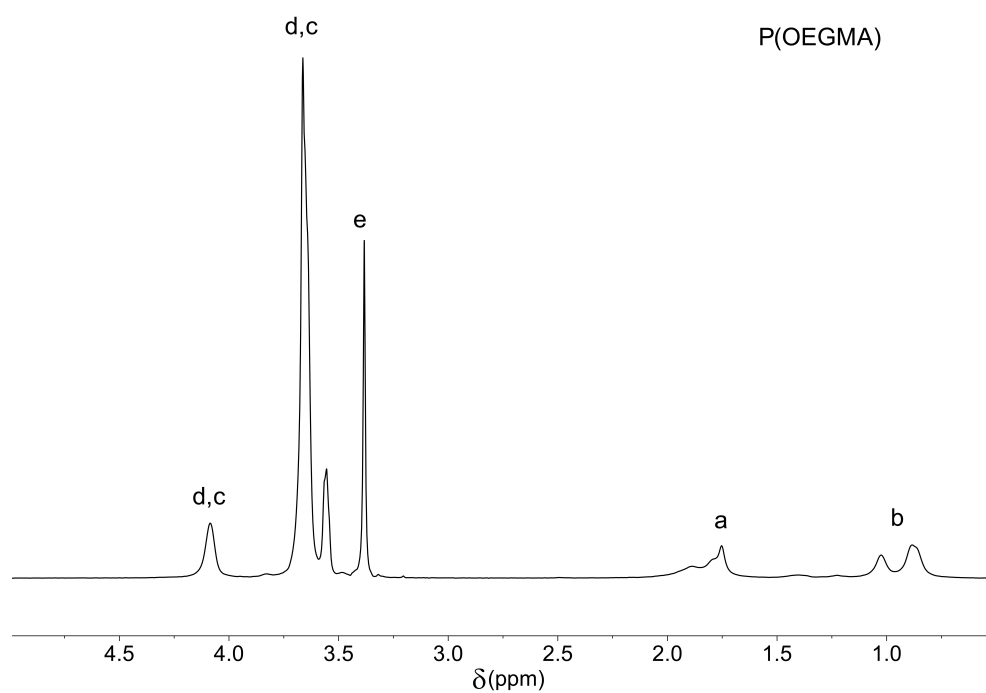

Figure 3 The  $^1\text{H}$ -NMR spectrum of the amphiphilic poly(OEGMA-*ran*-AEMA) random copolymer, the amphiphilic poly(OEGMA-*b*-AEMA) block copolymer, and the P(OEGMA) homopolymer in  $\text{CDCl}_3$  and the corresponding proton assignments.
